# Supplementary material for: Nusinersen ameliorates motor function and prevents motoneuron Cajal body disassembly and abnormal poly(A) RNA distribution in a SMA mouse model
Source: PubMed Central journal article supplement (PMC7330045; doi:10.1038/s41598-020-67569-3), 2020-07-01

**Nusinersen ameliorates motor function and prevents motoneuron Cajal body disassembly and abnormal poly(A) RNA distribution in a SMA mouse model.**

María T. Berciano<sup>1,4,5\*</sup>, Alba Puente-Bedia<sup>2\*</sup>, Almudena Medina-Samamé<sup>3</sup>, José C. Rodríguez-Rey<sup>1,4</sup>, Jordi Calderó<sup>6</sup>, Miguel Lafarga<sup>3,4,5</sup> and Olga Tapia<sup>4,5,7</sup>

1. Department of Molecular Biology, University of Cantabria, Santander, Spain.
2. Department of Physiology and Pharmacology, University of Cantabria, Santander, Spain.
3. Department of Anatomy and Cell Biology, University of Cantabria, Santander, Spain.
4. *Instituto de Investigación Marqués de Valdecilla IDIVAL*, Santander, Spain
5. *Centro de Investigación Biomédica en Red sobre Enfermedades Neurodegenerativas (CIBERNED)*.
6. Department of Experimental Medicine, School of Medicine, University of Lleida and *Institut de Recerca Biomèdica de Lleida (IRBLleida)*, Lleida, Spain.
7. *Universidad Europea del Atlántico*, Santander, Spain.

\* Contributed equally

**Abbreviated title:** Effects of nusinersen in SMA motor neurons

**Corresponding author:**

Dr. Olga Tapia

Instituto de Investigación Marqués de Valdecilla IDIVAL

Av. Cardenal Herrera Oria s/n

39011 Santander, Spain

e-mail: [tapiao@unican.es](mailto:tapiao@unican.es)

**Supplemental Information.** Full-length blots corresponding to Fig. 1O are presented

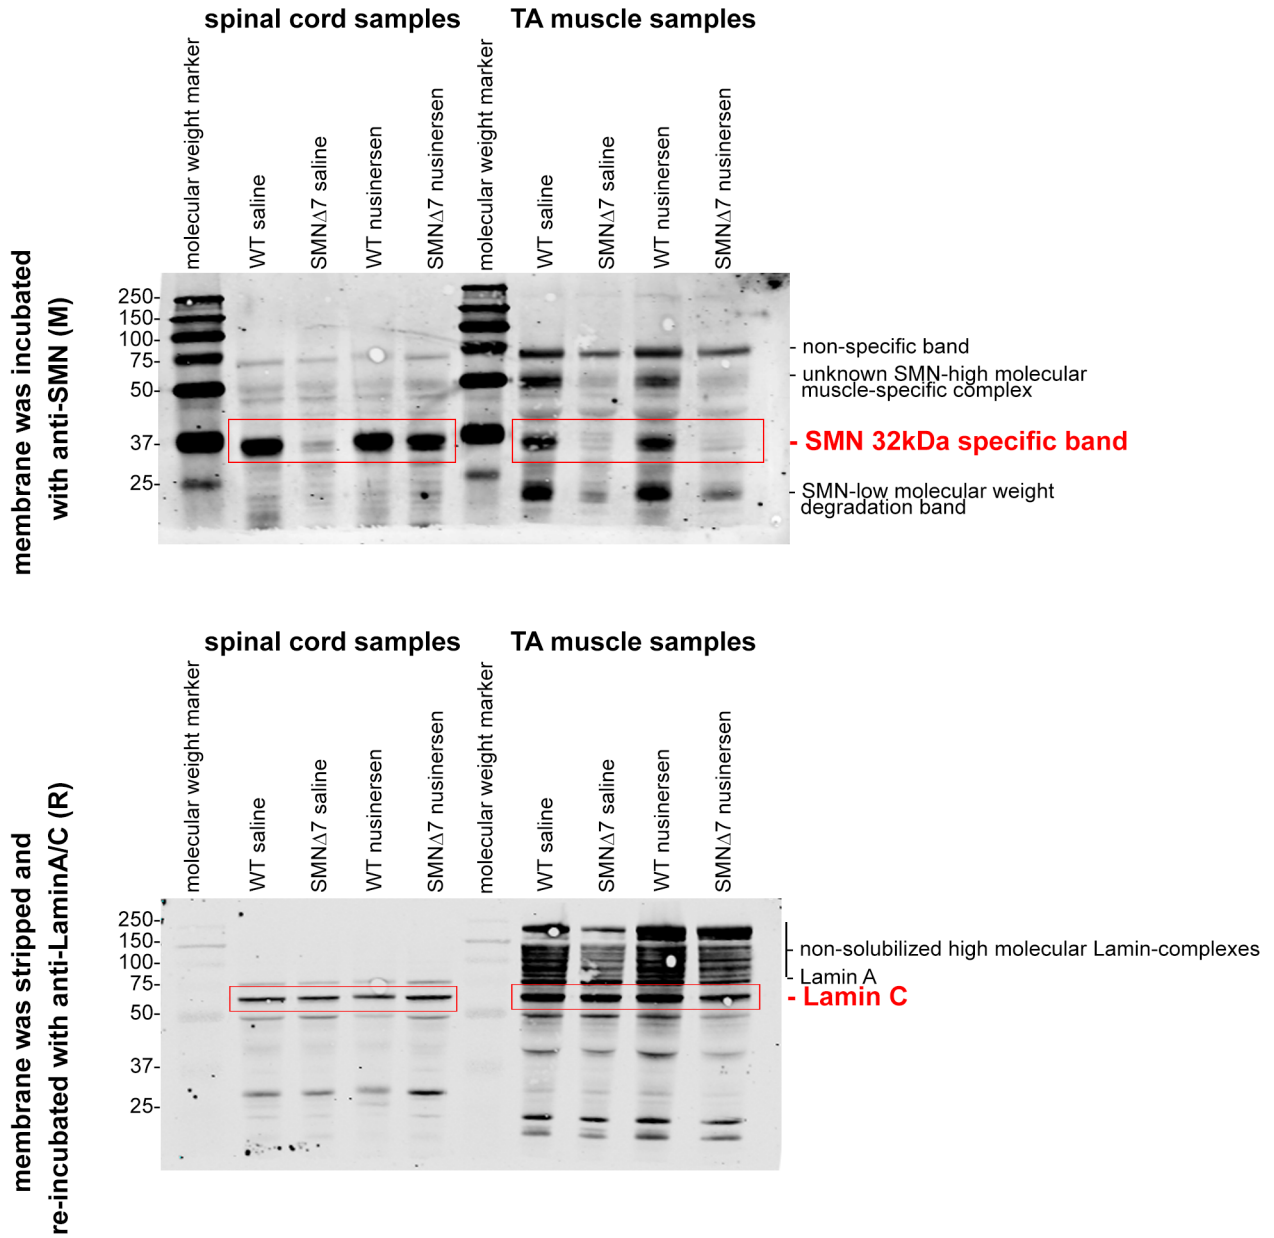

Supplement: 41598_2020_67569_MOESM2_ESM.pdf [file 41598_2020_67569_MOESM2_ESM.pdf]
